# Supplementary material
Source: PubMed Central journal article supplement (PMC4473440)
Supplement: rcse9607-530-s1.pdf [file rcse9607-530-s1.pdf]

| Appendix 1 Clinical details of the 39 revised metal-on-metal total hip replacements |           |                  |          |                    |                              |                        |                |                                                                                                     |
|-------------------------------------------------------------------------------------|-----------|------------------|----------|--------------------|------------------------------|------------------------|----------------|-----------------------------------------------------------------------------------------------------|
| Revision number                                                                     | Age / sex | Time to revision | Cup size | Primary indication | Revision indication          | Revision bearing       | Operative time | Outcome after revision                                                                              |
| 1                                                                                   | 78 M      | 0.01 yrs         | 52mm     | OA                 | Dislocation                  | MoM                    | 60 mins        | Died after 3.2 yrs                                                                                  |
| 2                                                                                   | 32 F      | 0.02 yrs         | 50mm     | DDH                | Dislocation                  | MoM                    | 67 mins        | 4.9 yrs no complications                                                                            |
| 3                                                                                   | 56 F      | 0.69 yrs         | 52mm     | OA                 | Recurrent dislocation        | MoP                    | 40 mins        | 0.1 yrs re-revised for dislocation (liner exchange)                                                 |
| 4*                                                                                  | 49 F      | 1.00 yrs         | 54mm     | OA                 | Aseptic loosening (femur)    | OxP                    | 185 mins       | 4.3 yrs no complications                                                                            |
| 5                                                                                   | 59 F      | 1.05 yrs         | 52mm     | OA                 | Stem subsidence with LLD     | MoM                    | 109 mins       | 0.1 yrs re-revised for periprosthetic stem fracture; subsequent evacuation of haematoma 2 wks later |
| 6                                                                                   | 58 F      | 1.25 yrs         | 54mm     | OA                 | Aseptic loosening (cup)      | MoM                    | 60 mins        | 0.2 yrs re-revision for aseptic cup loosening                                                       |
| 7* <sup>†</sup>                                                                     | 67 M      | 1.37 yrs         | 56mm     | OA                 | Deep infection               | 1st stage <sup>‡</sup> | 103 mins       | 4.0 yrs no complications                                                                            |
| 8                                                                                   | 78 M      | 1.69 yrs         | 54mm     | OA                 | ARMD                         | MoP                    | 80 mins        | 2.1 yrs no complications                                                                            |
| 9*                                                                                  | 66 M      | 1.81 yrs         | 60mm     | OA                 | Aseptic loosening (femur)    | MoP                    | 305 mins       | 2.2 yrs stem lucency but not re-revised                                                             |
| 10                                                                                  | 71 F      | 1.86 yrs         | 52mm     | OA                 | LLD                          | MoM                    | 97 mins        | 4.1 yrs re-revised for aseptic femoral loosening                                                    |
| 11*                                                                                 | 70 F      | 1.96 yrs         | 52mm     | OA                 | Deep infection               | MoP                    | 124 mins       | 3.6 yrs no complications                                                                            |
| 12                                                                                  | 46 F      | 1.97 yrs         | 50mm     | OA                 | Unexplained pain             | CoP                    | 60 mins        | 1.0 yrs no complications                                                                            |
| 13*                                                                                 | 48 F      | 2.00 yrs         | 52mm     | AVN                | Deep infection               | MoM                    | 90 mins        | 6.8 yrs no complications                                                                            |
| 14*                                                                                 | 63 F      | 2.03 yrs         | 52mm     | OA                 | Recurrent dislocation        | CoP                    | 48 mins        | 3.3 yrs no complications                                                                            |
| 15                                                                                  | 73 F      | 2.25 yrs         | 52mm     | OA                 | LLD                          | MoP                    | 65 mins        | 3.6 yrs no complications                                                                            |
| 16                                                                                  | 59 F      | 2.29 yrs         | 50mm     | SUFE               | ARMD                         | CoP                    | 81 mins        | 1.4 yrs no complications                                                                            |
| 17                                                                                  | 63 F      | 2.97 yrs         | 52mm     | OA                 | Aseptic loosening (femur)    | MoP                    | 106 mins       | 2.3 yrs no complications                                                                            |
| 18*                                                                                 | 63 F      | 3.53 yrs         | 50mm     | OA                 | Periprosthetic stem fracture | MoP                    | 128 mins       | 1.1 yrs no complications                                                                            |
| 19                                                                                  | 70 F      | 3.66 yrs         | 52mm     | OA                 | ARMD                         | CoP                    | 60 mins        | 1.8 yrs no complications                                                                            |
| 20* <sup>†</sup>                                                                    | 68 M      | 3.66 yrs         | 58mm     | OA                 | Deep infection               | 1st stage <sup>‡</sup> | 114 mins       | 3.1 yrs no complications                                                                            |
| 21                                                                                  | 58 F      | 3.69 yrs         | 50mm     | OA                 | ARMD                         | CoP                    | 66 mins        | 1.5 yrs no complications                                                                            |
| 22*                                                                                 | 68 F      | 4.01 yrs         | 52mm     | DDH                | Deep infection               | 1st stage <sup>‡</sup> | 81 mins        | 1.4 yrs no complications                                                                            |
| 23                                                                                  | 69 M      | 4.06 yrs         | 54mm     | OA                 | Aseptic loosening (femur)    | MoP                    | 259 mins       | 0.9 yrs no complications                                                                            |
| 24*                                                                                 | 60 F      | 4.08 yrs         | 52mm     | OA                 | Aseptic loosening (femur)    | MoP                    | 117 mins       | 4.1 yrs no complications                                                                            |
| 25                                                                                  | 67 F      | 4.20 yrs         | 52mm     | OA                 | ARMD                         | CoP                    | 81 mins        | 1.3 yrs no complications                                                                            |
| 26                                                                                  | 73 F      | 4.22 yrs         | 52mm     | OA                 | ARMD                         | MoP                    | 183 mins       | 1.0 yrs lucency around acetabular component but not revised                                         |
| 27                                                                                  | 60 F      | 4.24 yrs         | 52mm     | OA                 | ARMD                         | CoP                    | 92 mins        | 0.9 yrs no complications                                                                            |
| 28*                                                                                 | 61 F      | 4.43 yrs         | 52mm     | OA                 | ARMD                         | CoP                    | 90 mins        | 0.6 yrs no complications                                                                            |
| 29*                                                                                 | 62 M      | 4.51 yrs         | 58mm     | OA                 | ARMD                         | CoP                    | 103 mins       | 0.7 yrs no complications                                                                            |
| 30*                                                                                 | 72 F      | 4.83 yrs         | 52mm     | OA                 | Aseptic loosening (cup)      | MoP                    | 106 mins       | 0.5 yrs no complications                                                                            |

(Continued)

**Appendix 1** Clinical details of the 39 revised metal-on-metal total hip replacements (Continued)

|     |      |          |      |     |                           |     |          |                          |
|-----|------|----------|------|-----|---------------------------|-----|----------|--------------------------|
| 31  | 70 M | 5.01 yrs | 54mm | AVN | ARMD                      | CoP | 62 mins  | 0.3 yrs no complications |
| 32* | 72 F | 5.23 yrs | 54mm | OA  | ARMD                      | OxP | 118 mins | 1.4 yrs no complications |
| 33  | 65 F | 5.32 yrs | 52mm | OA  | Aseptic loosening (femur) | MoP | 127 mins | 1.5 yrs no complications |
| 34* | 69 F | 5.84 yrs | 52mm | OA  | ARMD                      | CoP | 46 mins  | 0.5 yrs no complications |
| 35* | 69 F | 6.06 yrs | 52mm | OA  | ARMD                      | CoP | 65 mins  | 0.2 yrs no complications |
| 36* | 63 F | 6.28 yrs | 54mm | OA  | ARMD                      | CoP | 85 mins  | 0.1 yrs no complications |
| 37* | 67 F | 7.33 yrs | 52mm | OA  | ARMD                      | CoP | 110 mins | 0.2 yrs no complications |
| 38* | 46 M | 8.13 yrs | 56mm | OA  | ARMD                      | MoP | 206 mins | 0.1 yrs no complications |
| 39  | 78 F | 8.26 yrs | 52mm | OA  | ARMD                      | CoP | 75 mins  | 0.1 yrs no complications |

ARMD = adverse reaction to metal debris; AVN = avascular necrosis; CoP = ceramic-on-polyethylene; DDH = developmental dysplasia of the hip; F = female; LLD = leg length discrepancy; M = male; MoM = metal-on-metal; MoP = metal-on-polyethylene; OA = osteoarthritis; OxP = Oxinium-on-polyethylene; SUFE = slipped upper femoral epiphysis

\*Bilateral MoM bearing (total hip replacement or hip resurfacing)

† Revision 7 and 20 was the same patient requiring bilateral MoM revision hip arthroplasty.

‡All first stage revisions performed for deep infection underwent successful second stage revision total hip arthroplasty using a MoP bearing.

**Appendix 2** Details of the 17 patients undergoing revision for adverse reaction to metal debris. Revision numbers correspond to those in Appendix 1

| Revision number | Initial cup inclination | Blood metal ion levels before revision | Imaging                                                                                | Revision performed                                 | ARMD intraoperative findings                                                            | Histopathology                                          |
|-----------------|-------------------------|----------------------------------------|----------------------------------------------------------------------------------------|----------------------------------------------------|-----------------------------------------------------------------------------------------|---------------------------------------------------------|
| 8               | 49.0°                   | Not performed                          | Ultrasonography + CT large joint effusion                                              | Head, cup and liner                                | Milky effusion; granulomatous infiltration; cup over anteverted                         | ARMD                                                    |
| 16              | 55.5°                   | Co 1,093nmol/l<br>Cr 699nmol/l         | Ultrasonography normal                                                                 | Head, cup and liner                                | Metallosis; cup with excessive inclination and anteversion                              | ARMD with prominent perivascular lymphocytic infiltrate |
| 19              | 39.7°                   | Not performed                          | Ultrasonography small effusion<br>X-ray proximal femoral osteolysis                    | Head and liner                                     | Milky effusion; granulomatous infiltration; cup over anteverted                         | ALVAL                                                   |
| 21              | 39.9°                   | Co 165nmol/l<br>Cr 129nmol/l           | Ultrasonography effusion                                                               | Head and liner                                     | Necrotic tissue in trochanteric bursa; free light brown watery fluid                    | ALVAL                                                   |
| 25              | 42.4°                   | Co 30nmol/l<br>Cr 25nmol/l             | Ultrasonography effusion                                                               | Head and liner                                     | Thickened trochanteric bursa with fluid content; thickened capsule with watery effusion | ARMD with lymphocytic infiltrate                        |
| 26              | 40.1°                   | Co 146nmol/l<br>Cr 54nmol/l            | X-ray acetabular osteolysis with medial migration of socket<br>MRI two large effusions | Stemmed acetabular component and long femoral stem | Abductor detachment; pelvic discontinuity; significant osteolysis of femur              | ARMD                                                    |
| 27              | 49.6°                   | Co 93nmol/l<br>Cr 20nmol/l             | Ultrasonography effusion                                                               | Head, cup and liner                                | 15ml black stained fluid; metallosis; cup open and in 30° of anteversion                | ARMD                                                    |

(Continued)

**Appendix 2** Details of the 17 patients undergoing revision for adverse reaction to metal debris. Revision numbers correspond to those in Appendix 1 (Continued)

|     |       |                                |                                                               |                                      |                                                                                                                                             |      |
|-----|-------|--------------------------------|---------------------------------------------------------------|--------------------------------------|---------------------------------------------------------------------------------------------------------------------------------------------|------|
| 28* | 37.5° | Co 443nmol/l<br>Cr 313nmol/l   | Ultrasonography +<br>MRI small effusion                       | Head and liner                       | Metallosis of abductors<br>and trochanteric bursa                                                                                           | ARMD |
| 29* | 45.5° | Co 12nmol/l<br>Cr 27nmol/l     | Ultrasonography<br>effusion                                   | Stem, head and liner                 | Extensive inflammatory<br>haemorrhagic tissues;<br>proximal femoral osteol-<br>ysis exposing upper 3/4<br>of stem; osteolysis<br>around cup | ARMD |
| 31  | 45.7° | Co 65nmol/l<br>Cr 11nmol/l     | CT and MRI moderate<br>effusion                               | Head and liner                       | 100ml thick white fluid /<br>metal debris; hip dislo-<br>cating easily; anterior<br>scar tissue                                             | ARMD |
| 32* | 44.5° | Co 31nmol/l<br>Cr 23nmol/l     | Ultrasonography normal                                        | Stem, head, cup and<br>liner         | Metallosis; neutral cup;<br>well fixed but proud<br>stem                                                                                    | ARMD |
| 34* | 38.5° | Co 174nmol/l<br>Cr 25nmol/l    | MRI effusions                                                 | Head and liner                       | Mild effusion; necrotic<br>tissue in capsule;<br>trunnion corrosion                                                                         | ARMD |
| 35* | 43.2° | Co 151nmol/l<br>Cr 44nmol/l    | Ultrasonography +<br>MRI small effusion                       | Head and liner                       | 20ml black stained<br>metal debris fluid;<br>trunnion stained black                                                                         | ARMD |
| 36* | 46.3° | Co 147nmol/l<br>Cr 184nmol/l   | Ultrasonography +<br>MRI moderate effusion                    | Head and liner                       | Breakdown of previous<br>repair with black/grey<br>fluid communicating<br>with joint; metallosis                                            | ARMD |
| 37* | 46.6° | Co 263nmol/l<br>Cr 194nmol/l   | Ultrasonography normal                                        | Head and liner                       | Metallosis; well fixed<br>components                                                                                                        | ARMD |
| 38* | 51.7° | Co 1,061nmol/l<br>Cr 716nmol/l | X-ray femoral osteolysis<br>Ultrasonography large<br>effusion | Long modular femoral<br>stem and cup | Large green/brown fluid<br>collection; extensive<br>metallosis; cup open<br>and anteverted                                                  | ARMD |
| 39  | 49.3° | Co 232nmol/l<br>Cr 155nmol/l   | MRI normal                                                    | Head and liner                       | Metallosis                                                                                                                                  | ARMD |

ALVAL = aseptic lymphocytic vasculitis associated lesion; ARMD = adverse reaction to metal debris; Co = cobalt; Cr = chromium;  
CT = computed tomography; MRI = magnetic resonance imaging  
\*Bilateral metal-on-metal bearing (total hip replacement or hip resurfacing)
